# Supplementary material for: The Effects of 4 Weeks of Chiropractic Spinal Adjustments on Motor Function in People with Stroke: A Randomized Controlled Trial
Source: MDPI journal article supplement (doi:10.3390/brainsci11060676), 2021-05-21
Supplement: s1 [file s1]

# Statistics Report: The effects of 4 weeks of chiropractic spinal adjustment on motor function in people with stroke: A randomized controlled trial

Usman Rashid

## Contents

|          |                                                                                |           |
|----------|--------------------------------------------------------------------------------|-----------|
| <b>1</b> | <b>Data Visualisations</b>                                                     | <b>2</b>  |
| 1.1      | Fugl-Meyer Assessment Scale . . . . .                                          | 2         |
| 1.2      | Fugl-Meyer Assessment Scale – Upper Extremity . . . . .                        | 3         |
| 1.3      | Fugl-Meyer Assessment Scale – Lower Extremity . . . . .                        | 4         |
| 1.4      | Stroke Specific Quality of Life Scale (QOL) . . . . .                          | 5         |
| 1.5      | Timed Up and Go Test (TUG) . . . . .                                           | 6         |
| 1.6      | Modified Rankin Scale (mRS) . . . . .                                          | 7         |
| 1.7      | Five-repetition Sit-to-Stand Test (SST) . . . . .                              | 8         |
| 1.8      | Baseline versus Follow-up . . . . .                                            | 9         |
| 1.8.1    | Fugl-Meyer Assessment Scale – Full, Upper Extremity, Lower Extremity . . . . . | 9         |
| 1.8.2    | QOL, TUG, mRS, SST . . . . .                                                   | 10        |
| <b>2</b> | <b>Statistical Models</b>                                                      | <b>11</b> |
| 2.1      | Longitudnal Analysis of Covariance . . . . .                                   | 11        |
| 2.2      | Analysis of Variance . . . . .                                                 | 11        |
| 2.3      | Diagnostics for the Models . . . . .                                           | 12        |
| 2.3.1    | Fugl-Meyer Assessment Scale . . . . .                                          | 12        |
| 2.3.2    | Fugl-Meyer Assessment Scale – Upper Extremity . . . . .                        | 13        |
| 2.3.3    | Fugl-Meyer Assessment Scale – Lower Extremity . . . . .                        | 14        |
| 2.3.4    | QOL . . . . .                                                                  | 15        |
| 2.3.5    | TUG . . . . .                                                                  | 16        |
| 2.3.6    | SST . . . . .                                                                  | 18        |
| <b>3</b> | <b>Results</b>                                                                 | <b>20</b> |
| 3.1      | Fugl-Meyer Assessment Scale . . . . .                                          | 20        |
| 3.2      | Fugl-Meyer Assessment Scale – Upper Extremity . . . . .                        | 20        |
| 3.3      | Fugl-Meyer Assessment Scale – Lower Extremity . . . . .                        | 20        |
| 3.4      | QOL . . . . .                                                                  | 21        |
| 3.5      | TUG . . . . .                                                                  | 21        |
| 3.6      | mRS . . . . .                                                                  | 21        |
| 3.7      | SST . . . . .                                                                  | 22        |

# 1 Data Visualisations

Participant-wise scores along with group-wise means and standard errors for the two interventions at pre-randomization baseline, at the end of the interventions (4-weeks) and at the follow-up (8-weeks). The baseline means and standard errors are calculated from the raw data, whereas the remaining statistics are from the fitted models which compute means and standard errors after adjusting for the baseline scores. For SST, baseline means are also estimated by the respective model and, thus, baseline adjustment is not possible.

## 1.1 Fugl-Meyer Assessment Scale

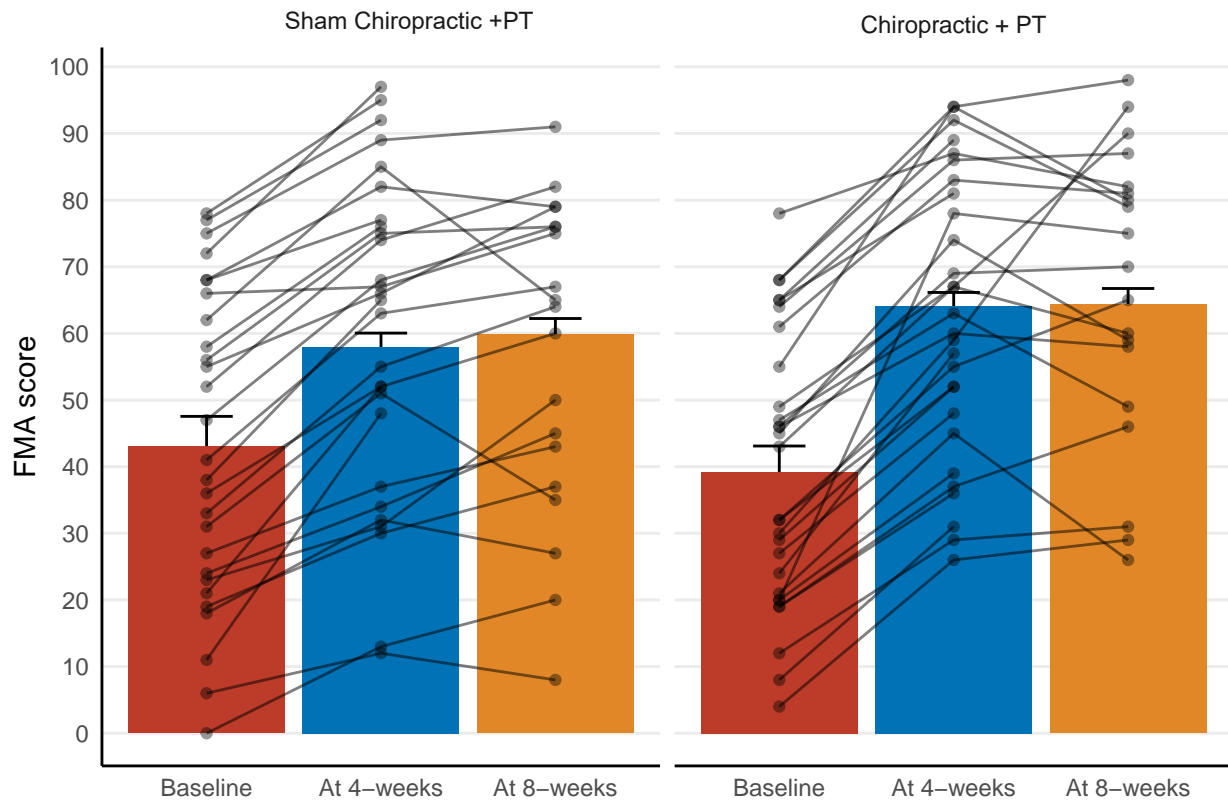

## 1.2 Fugl-Meyer Assessment Scale – Upper Extremity

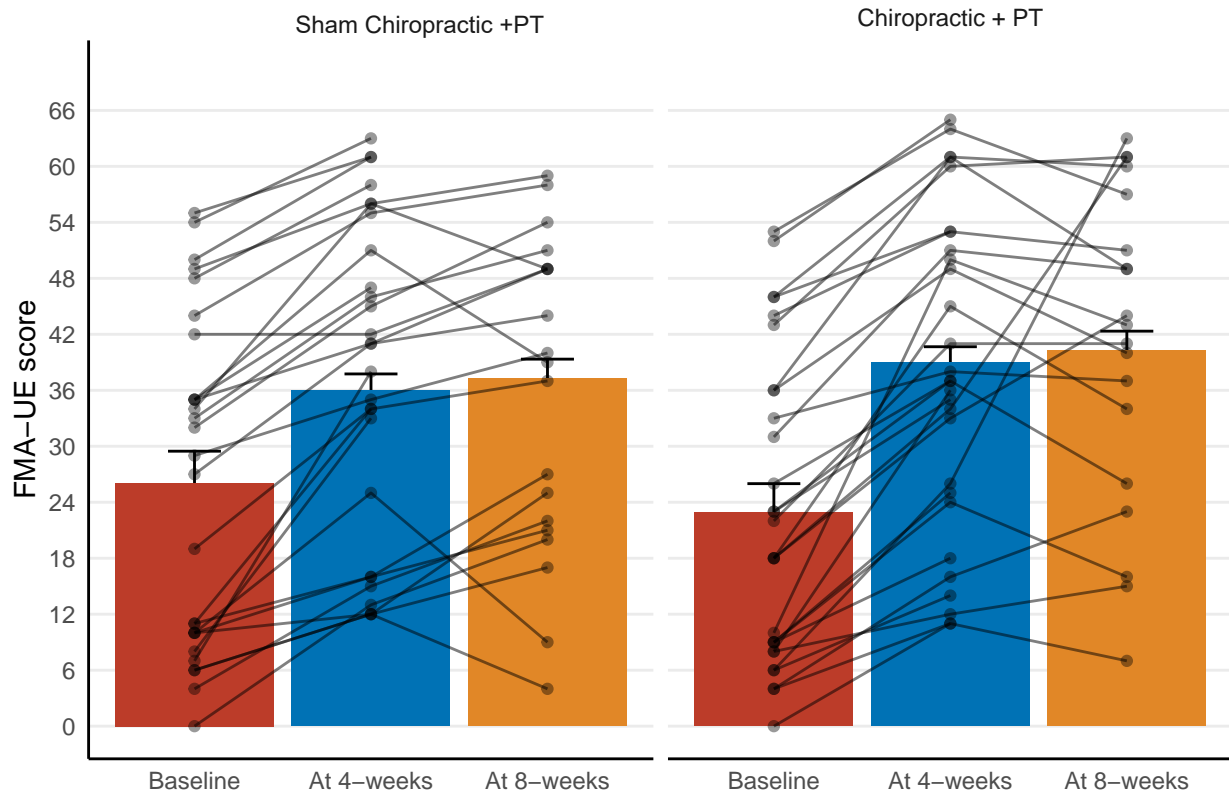

### 1.3 Fugl-Meyer Assessment Scale – Lower Extremity

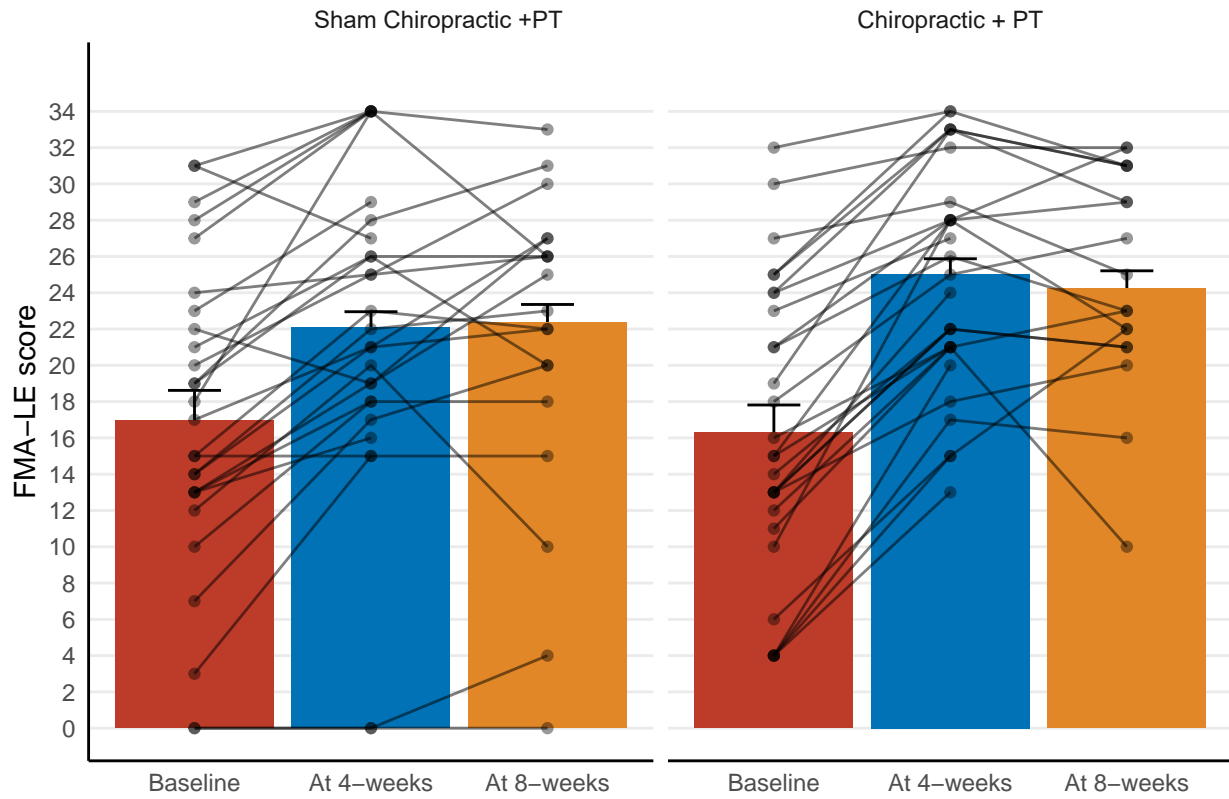

### 1.4 Stroke Specific Quality of Life Scale (QOL)

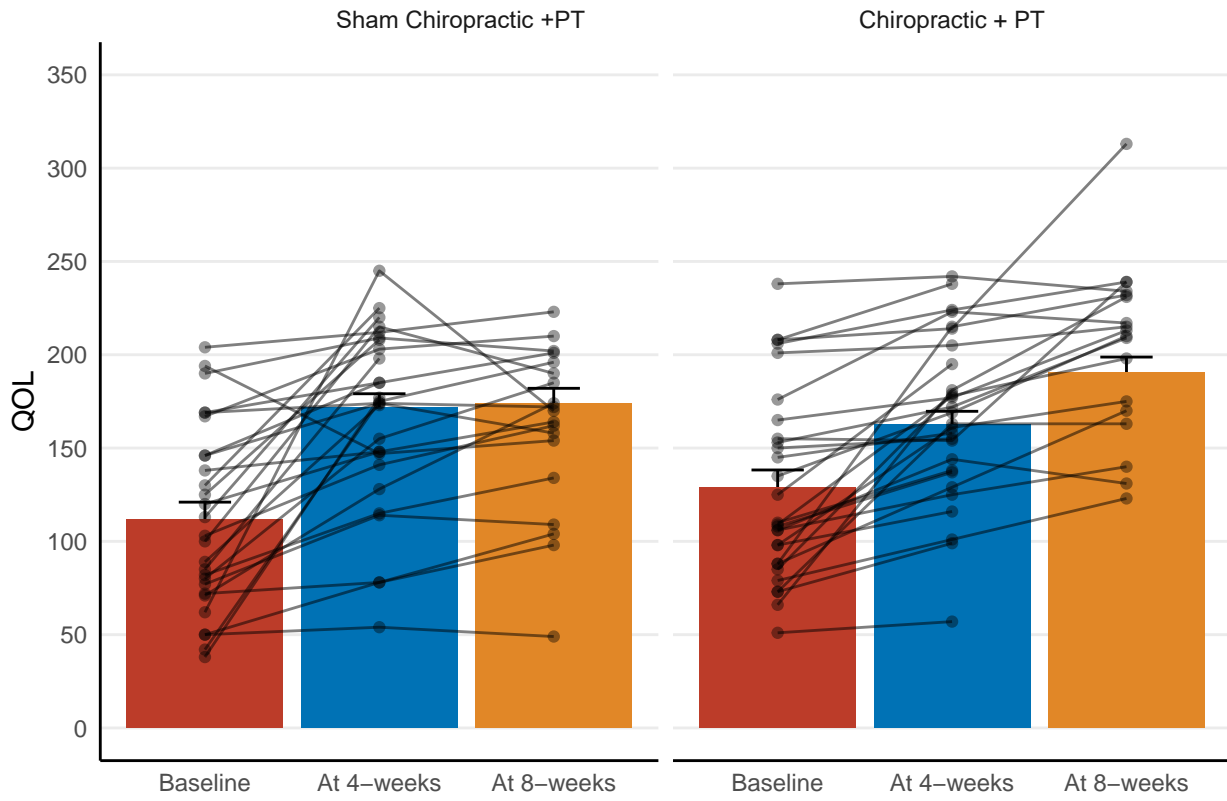

### 1.5 Timed Up and Go Test (TUG)

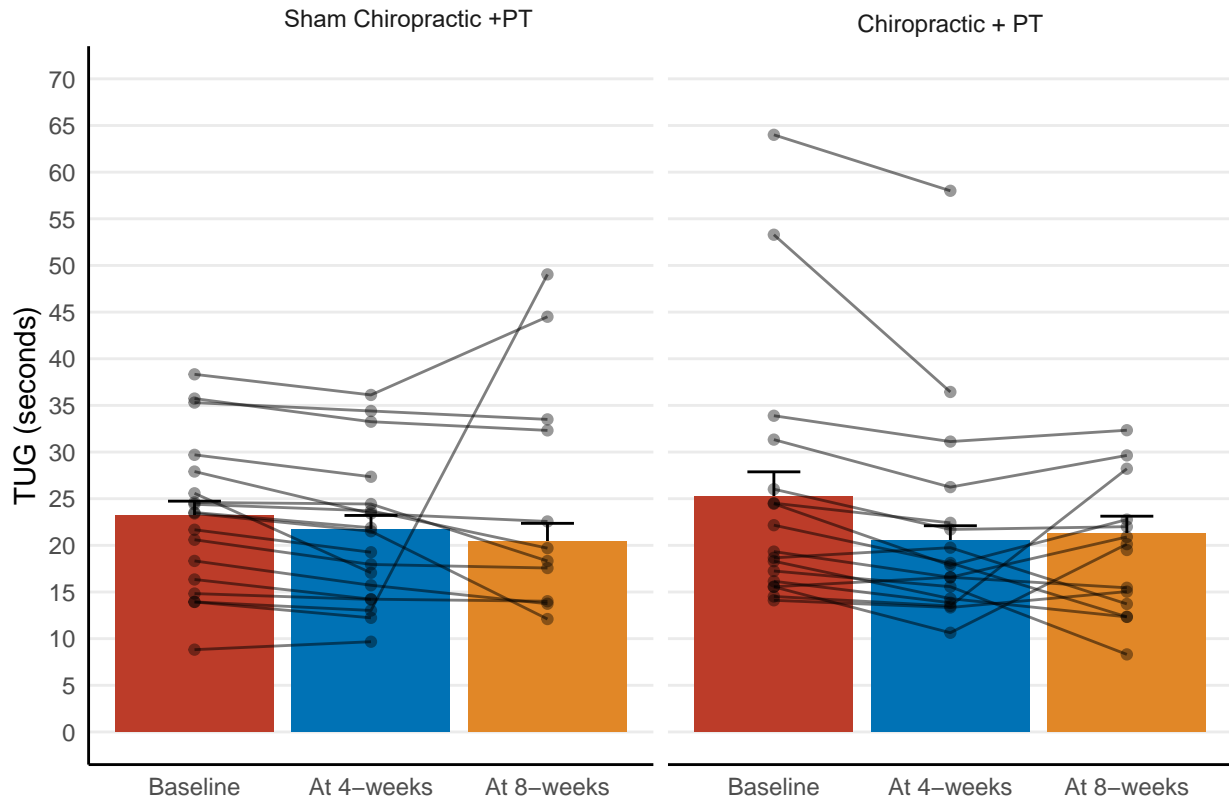

## 1.6 Modified Rankin Scale (mRS)

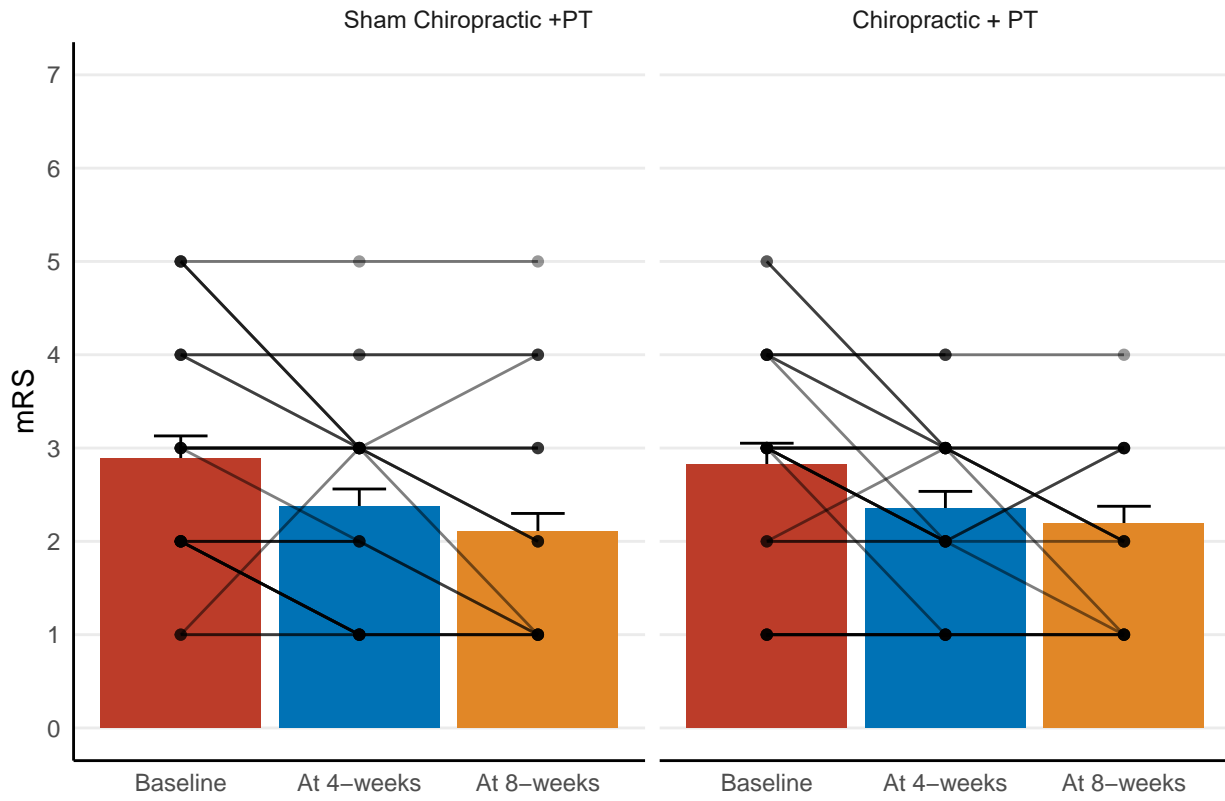

### 1.7 Five-repetition Sit-to-Stand Test (SST)

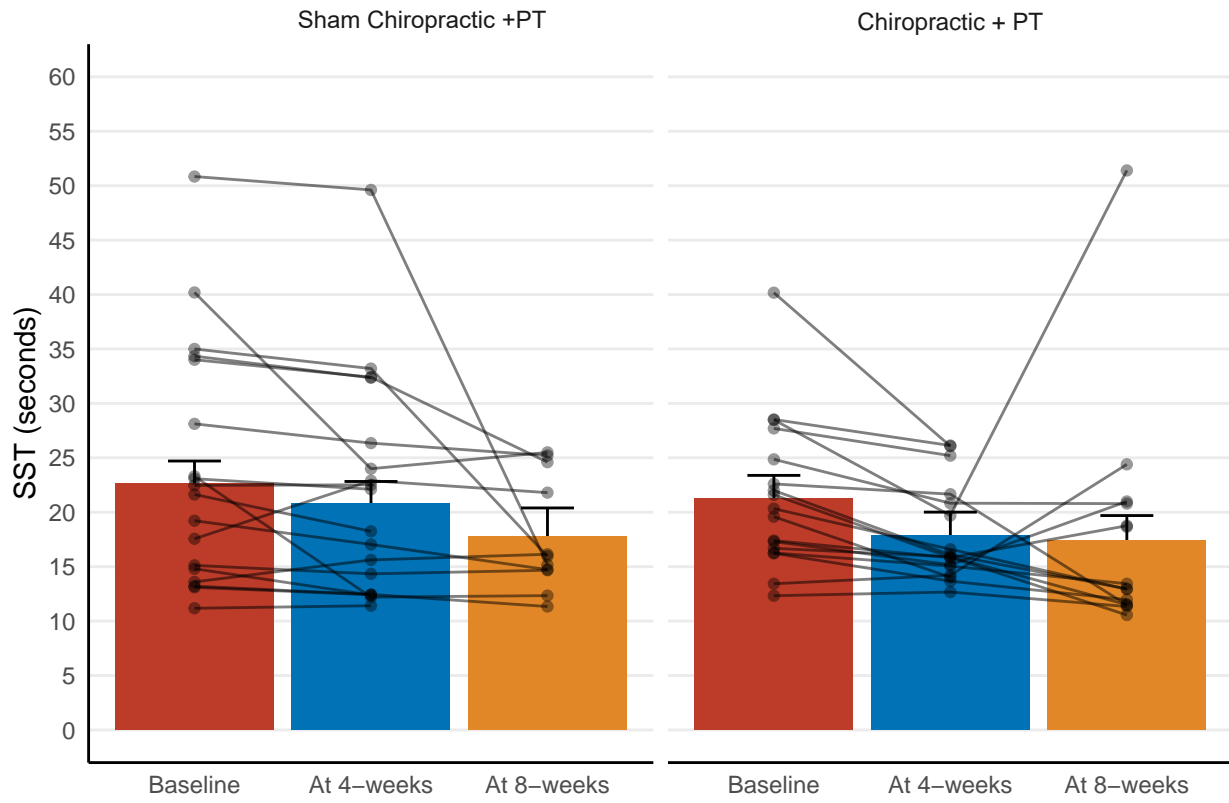



## 1.8 Baseline versus Follow-up

### 1.8.1 Fugl-Meyer Assessment Scale – Full, Upper Extremity, Lower Extremity

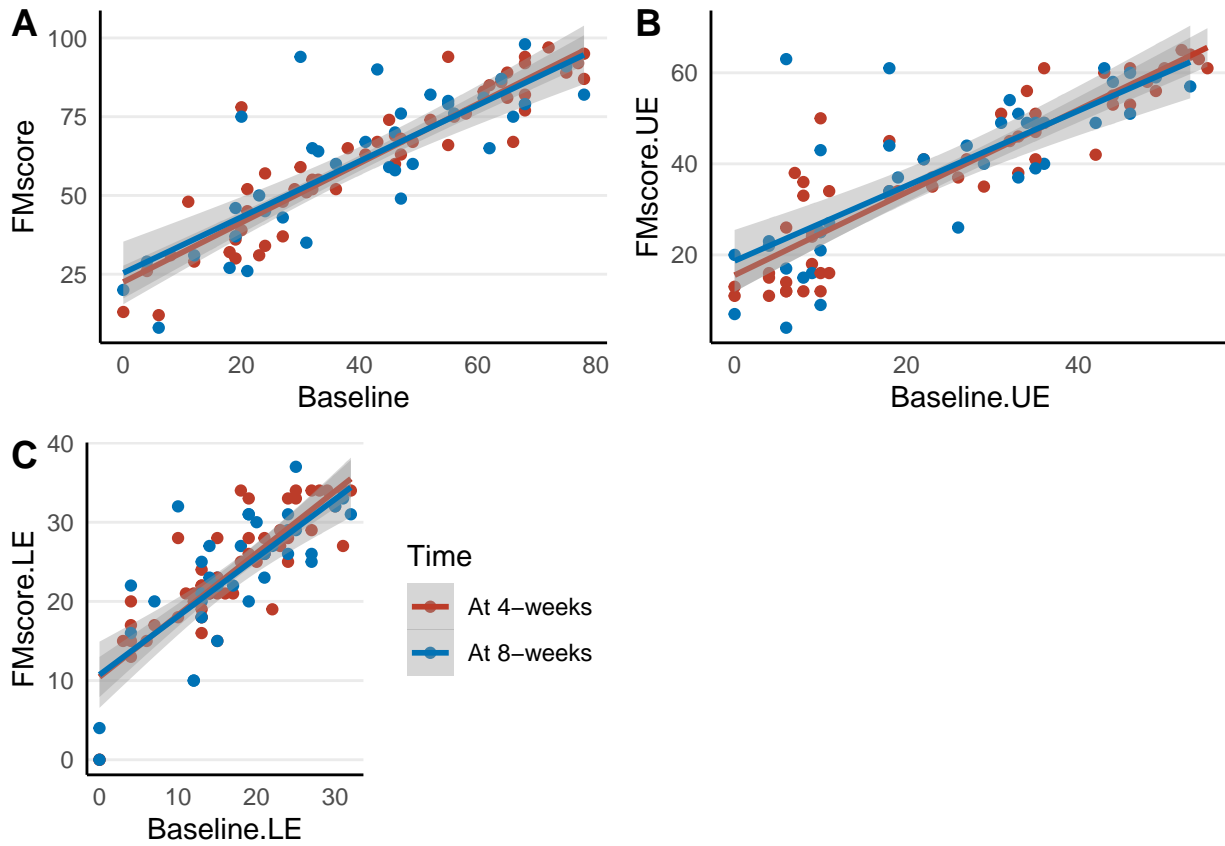

### 1.8.2 QOL, TUG, mRS, SST

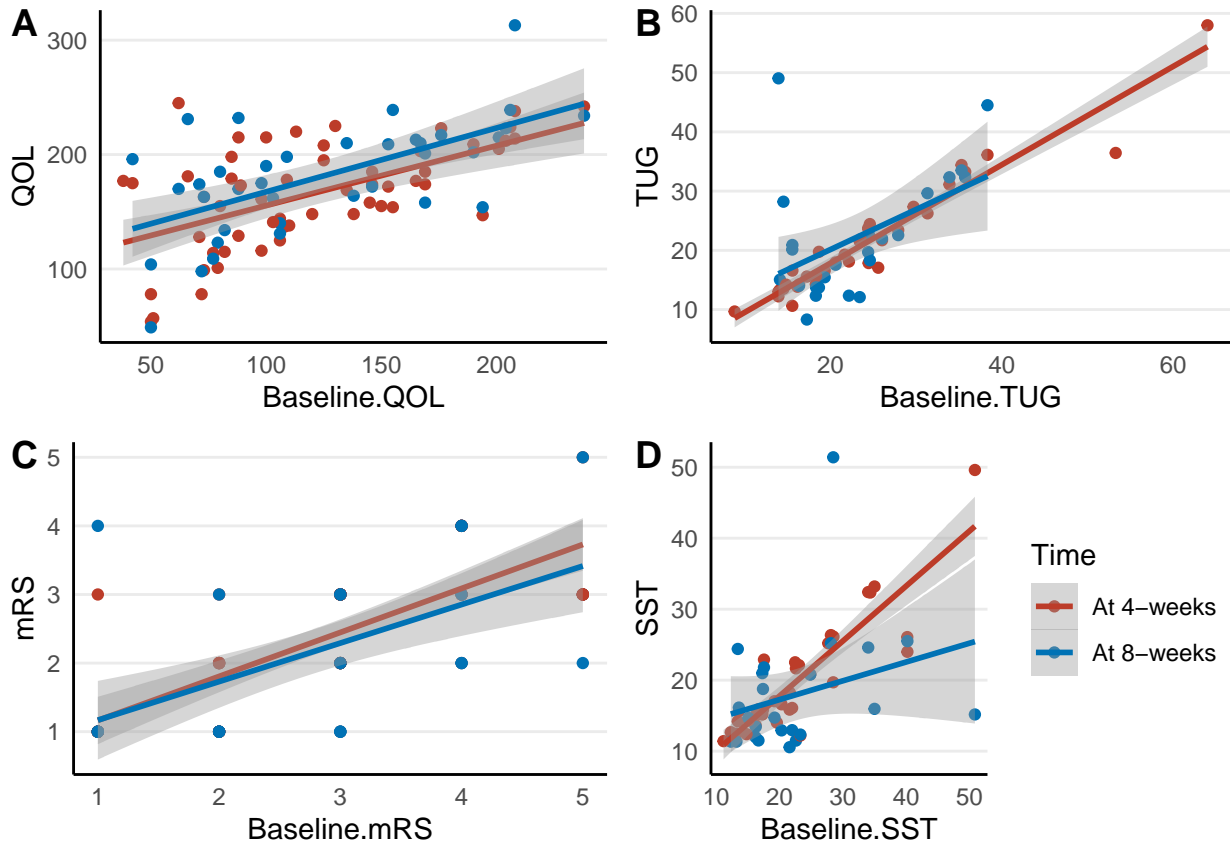

## 2 Statistical Models

### 2.1 Longitudnal Analysis of Covariance

```
lmerModel.full <- lmer(FMscore ~ Baseline + Group*Time + (1|PartId),
  Datasource,
  na.action = na.omit)

lmerModel.UE <- lmer(FMscore.UE ~ Baseline.UE + Group*Time + (1|PartId),
  Datasource.UE,
  na.action = na.omit)

lmerModel.LE <- lmer(FMscore.LE ~ Baseline.LE + Group*Time + (1|PartId),
  Datasource.LE,
  na.action = na.omit)

lmerModel.QOL <- lmer(QOL ~ Baseline.QOL + Group*Time + (1|PartId),
  Datasource.QOL,
  na.action = na.omit)

rlmerModel.TUG <- rlmer(TUG ~ Baseline.TUG + Group*Time + (1|PartId),
  Datasource.TUG,
  na.action = na.omit)

glmerModel.mRS <- glmer(mRS ~ Baseline.mRS + Group*Time + (1|PartId),
  Datasource.mRS,
  na.action = na.omit,
  family = Gamma(link = "identity"))
```

### 2.2 Analysis of Variance

```
rlmerModel.SST <- rlmer(SST ~ Group*Time + (1|PartId),
  Datasource.SST.including.baseline,
  na.action = na.omit)
```

## 2.3 Diagnostics for the Models

### 2.3.1 Fugl-Meyer Assessment Scale

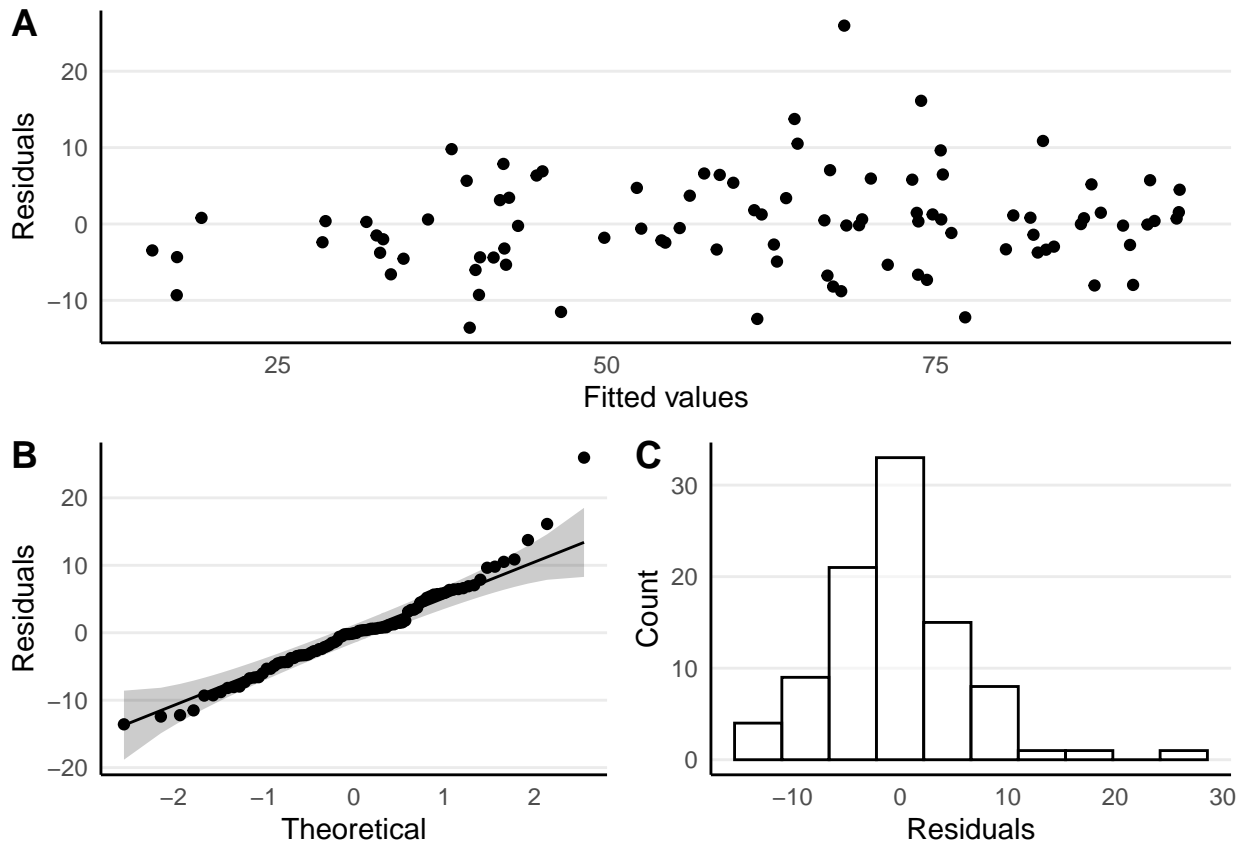

### 2.3.2 Fugl-Meyer Assessment Scale – Upper Extremity

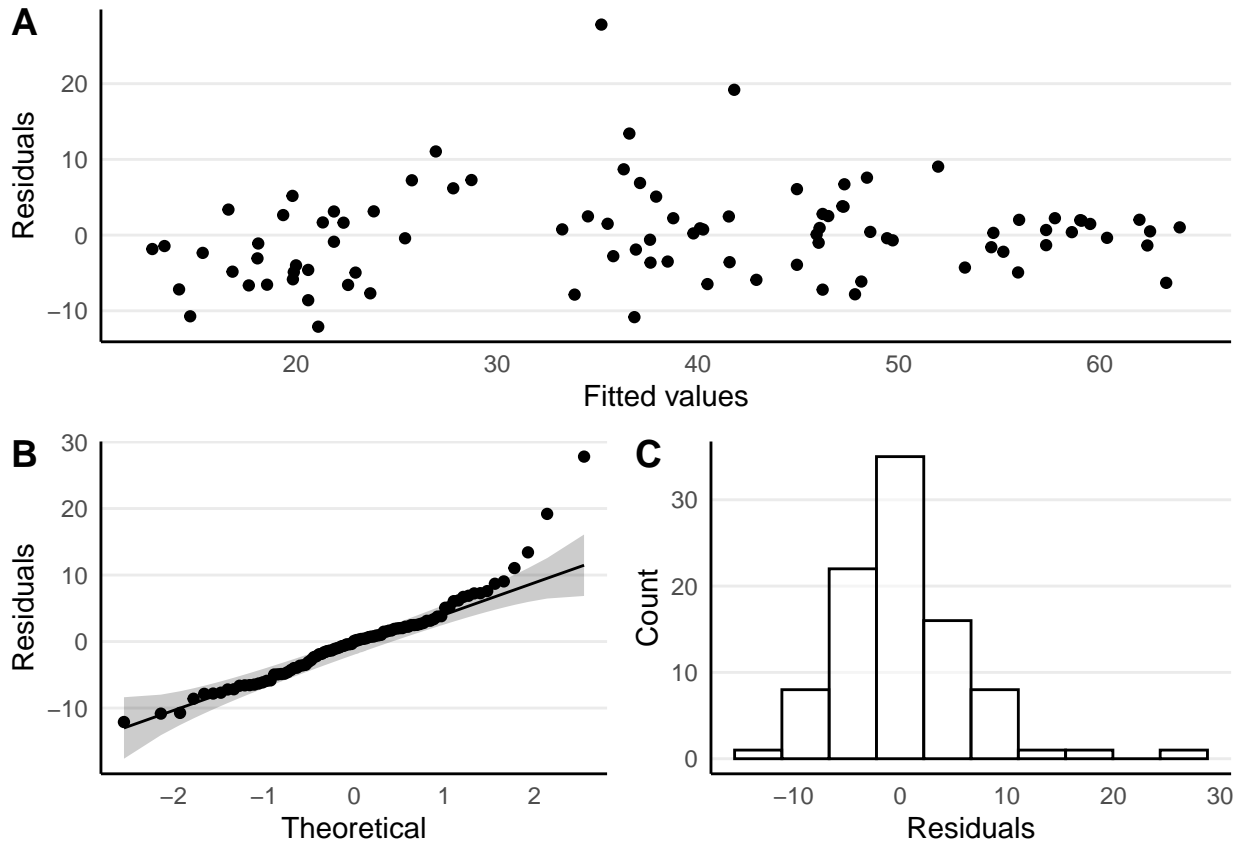

### 2.3.3 Fugl-Meyer Assessment Scale – Lower Extremity

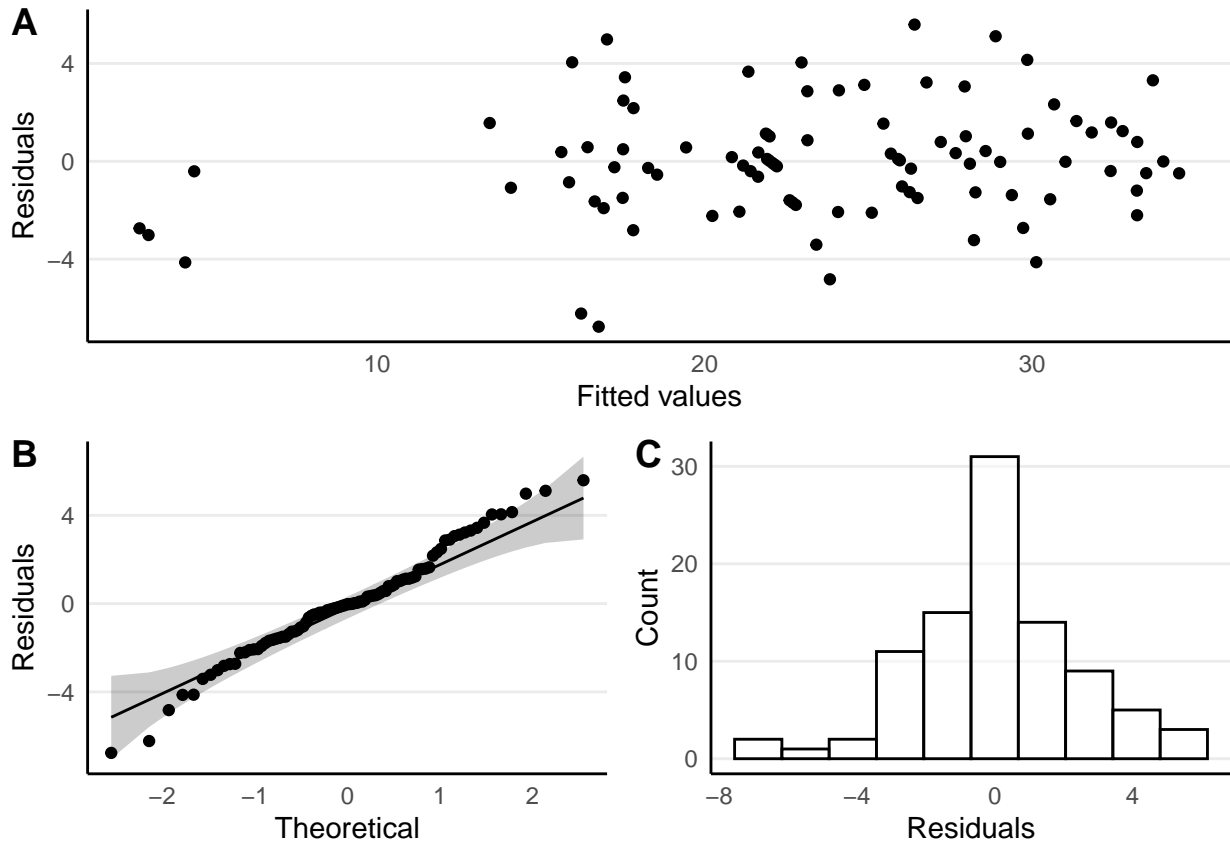

### 2.3.4 QOL

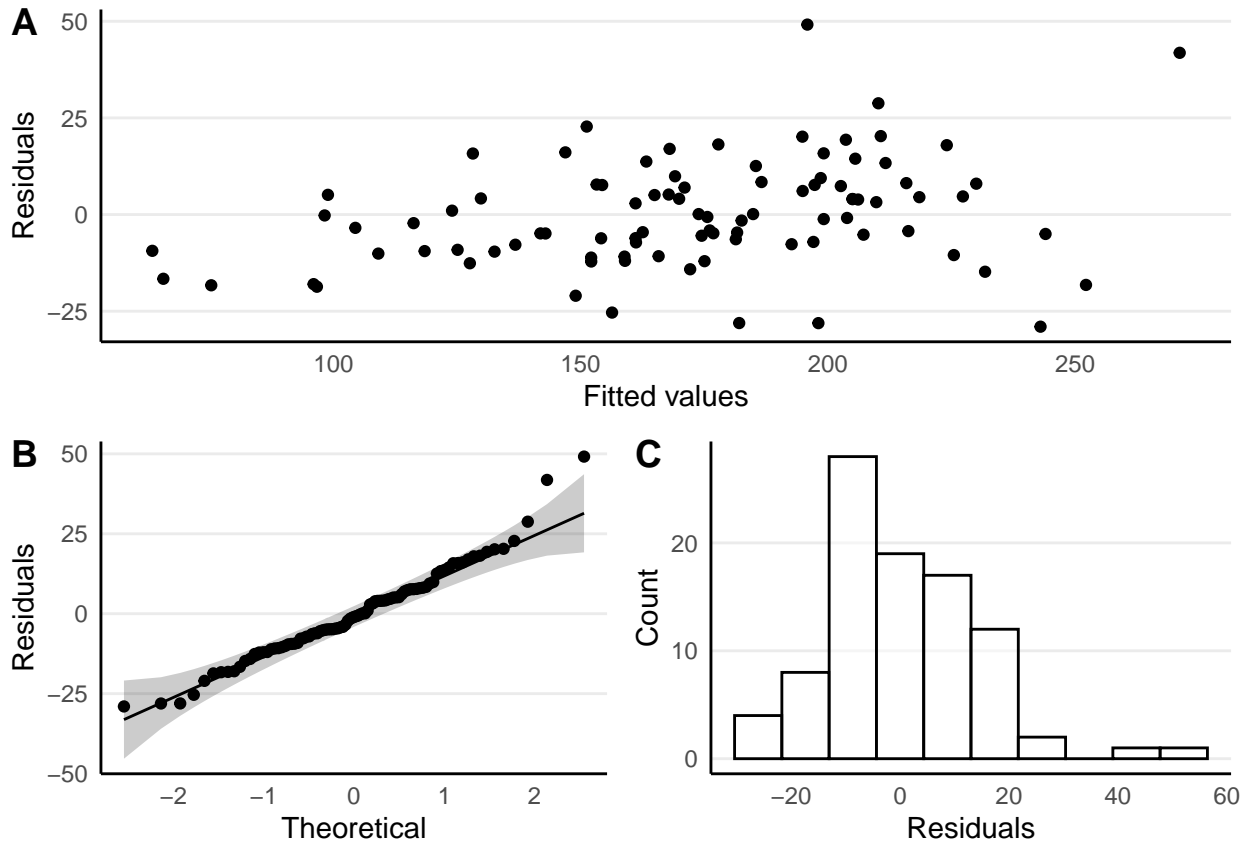

### 2.3.5 TUG

#### Fitted Values vs. Residuals

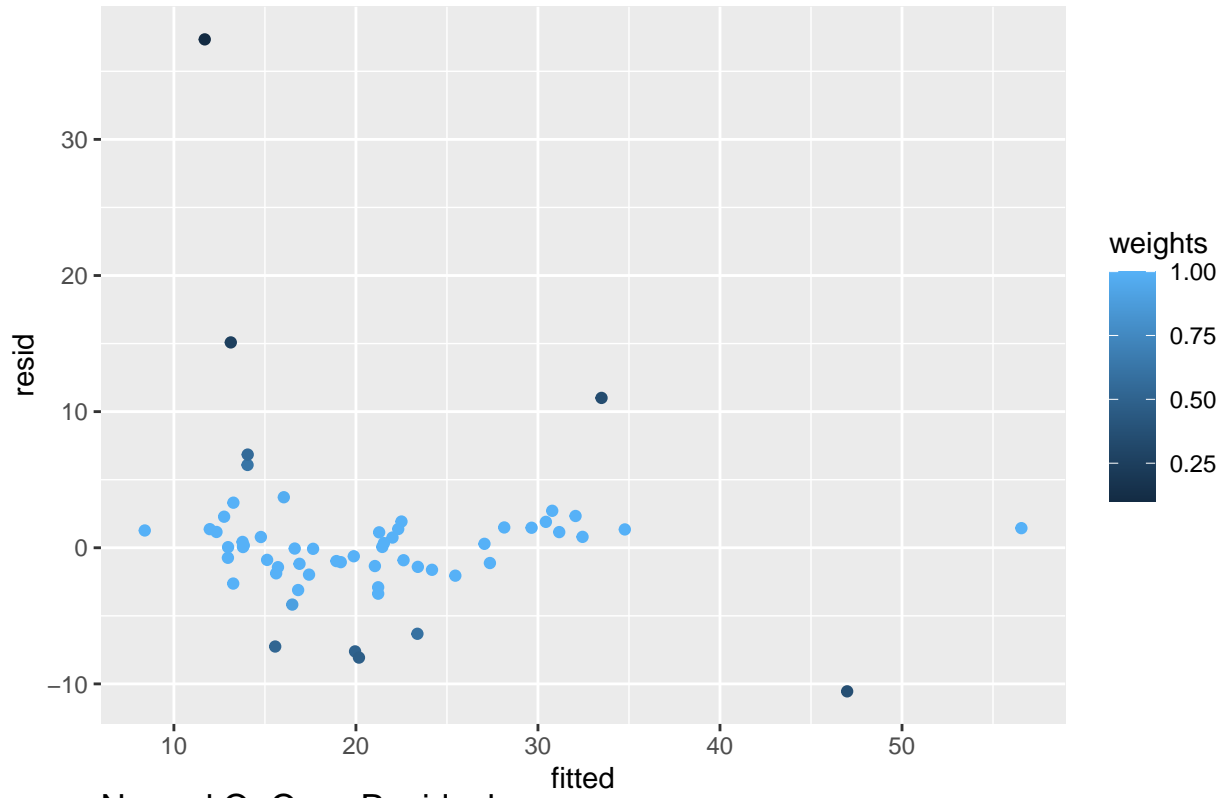

#### Normal Q-Q vs. Residuals

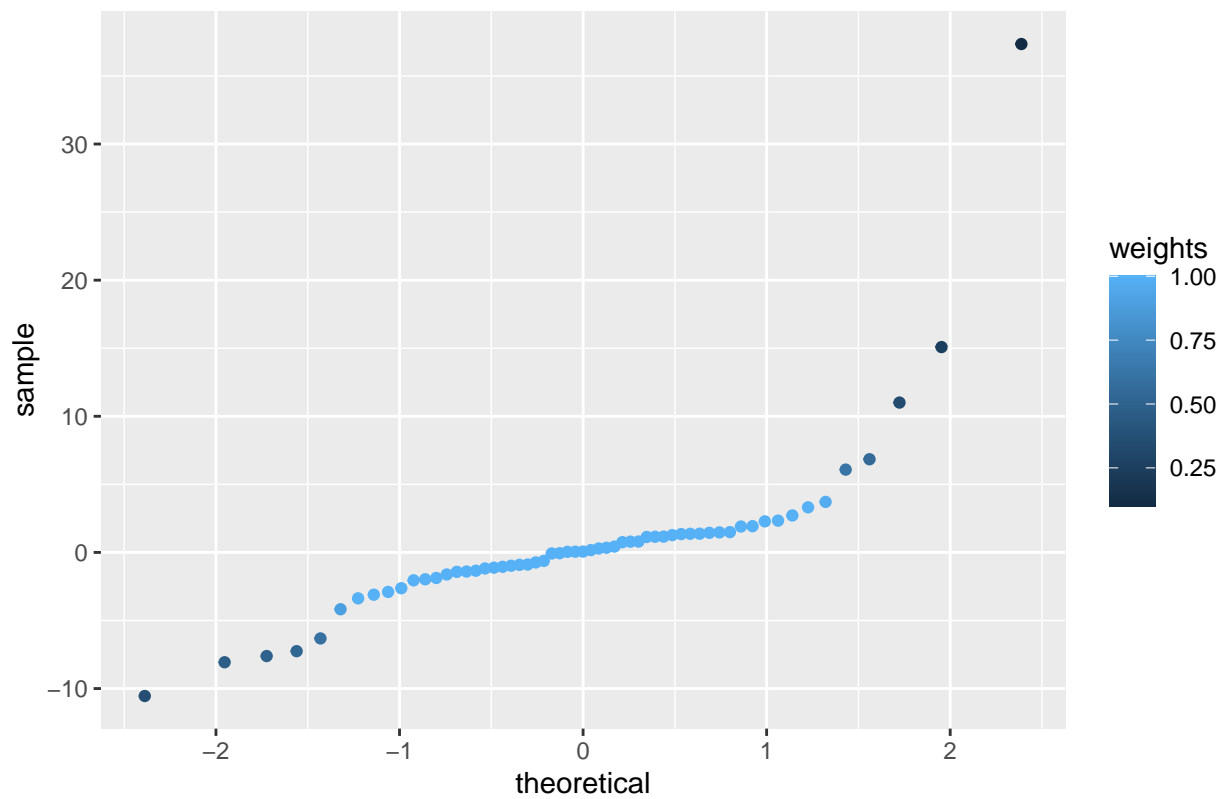



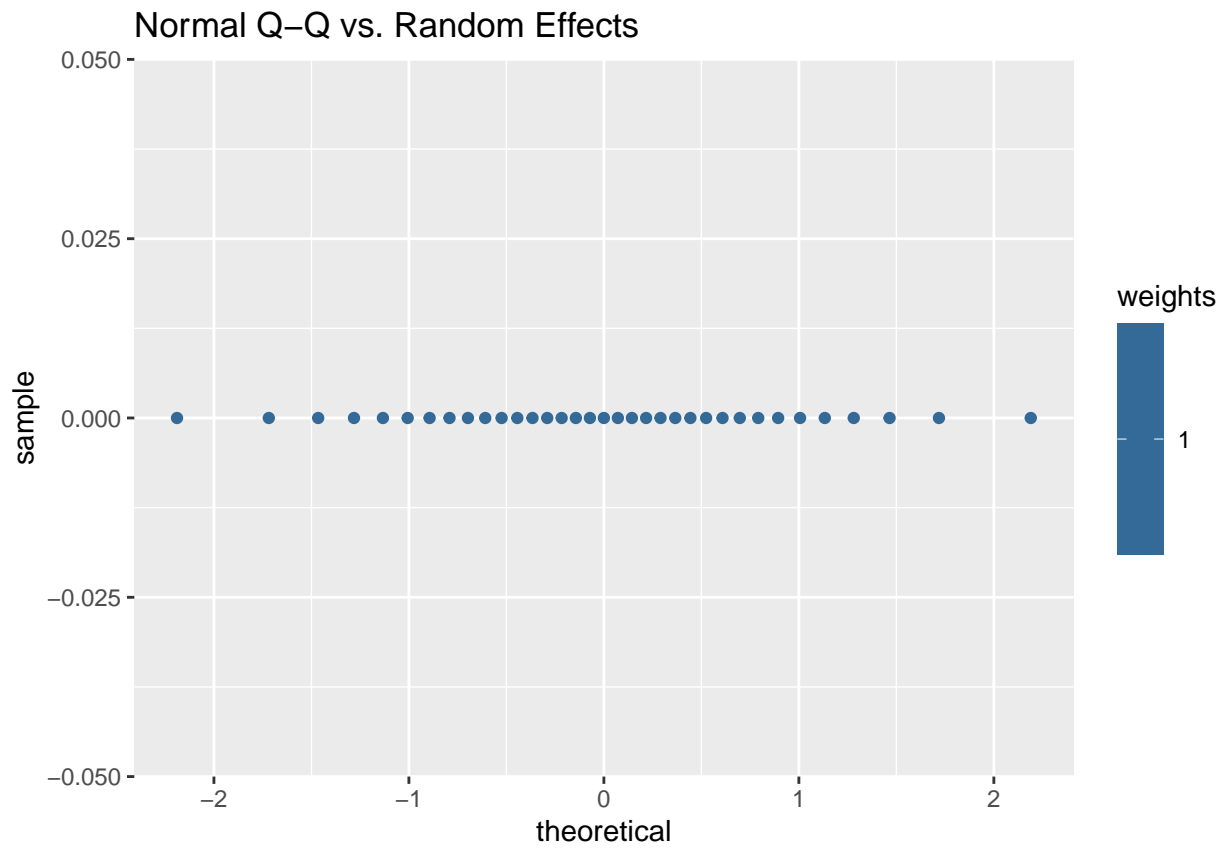

### 2.3.6 SST

#### Fitted Values vs. Residuals

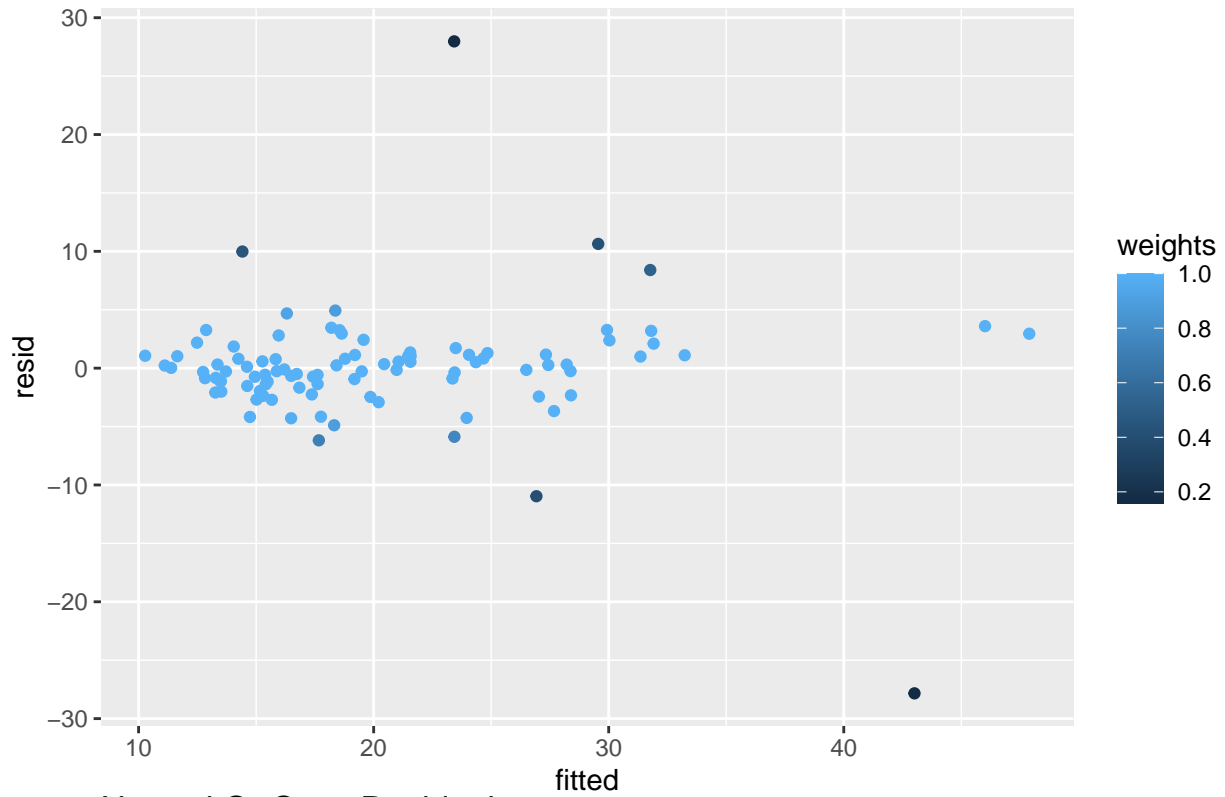

#### Normal Q-Q vs. Residuals

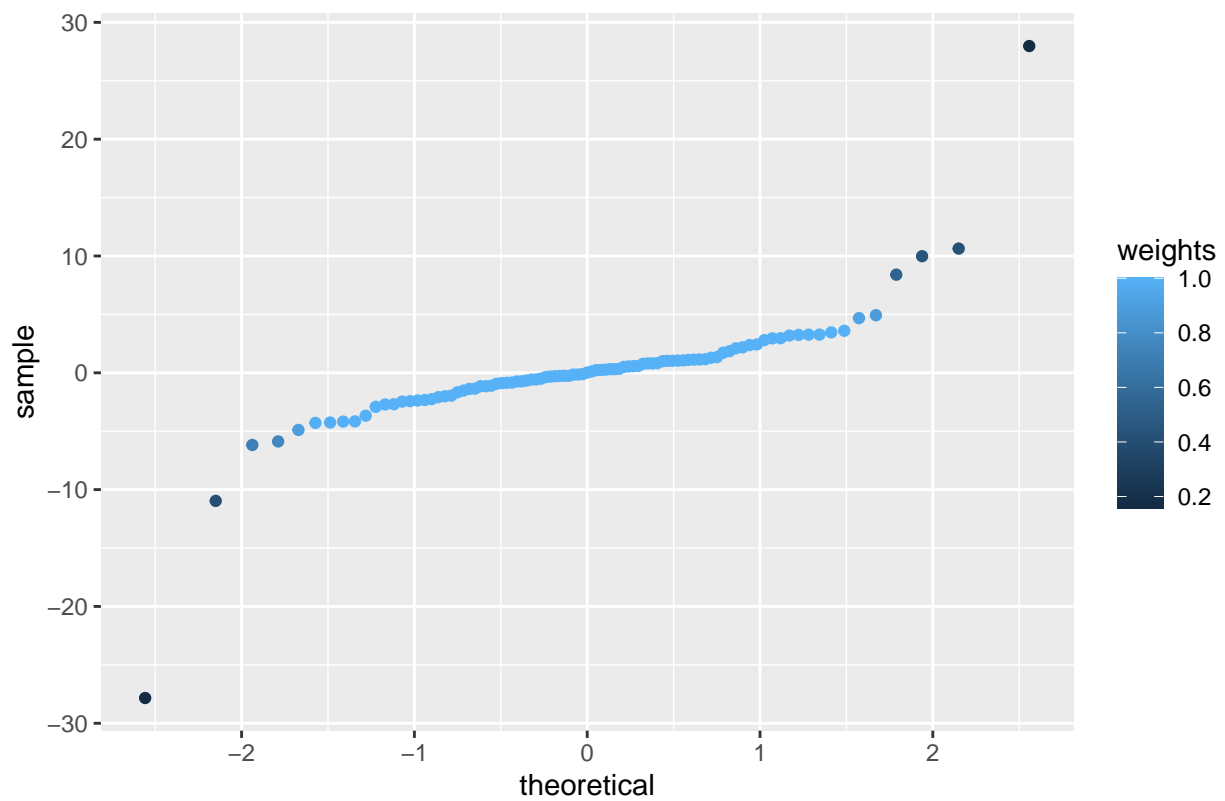

Normal Q-Q vs. Random Effects

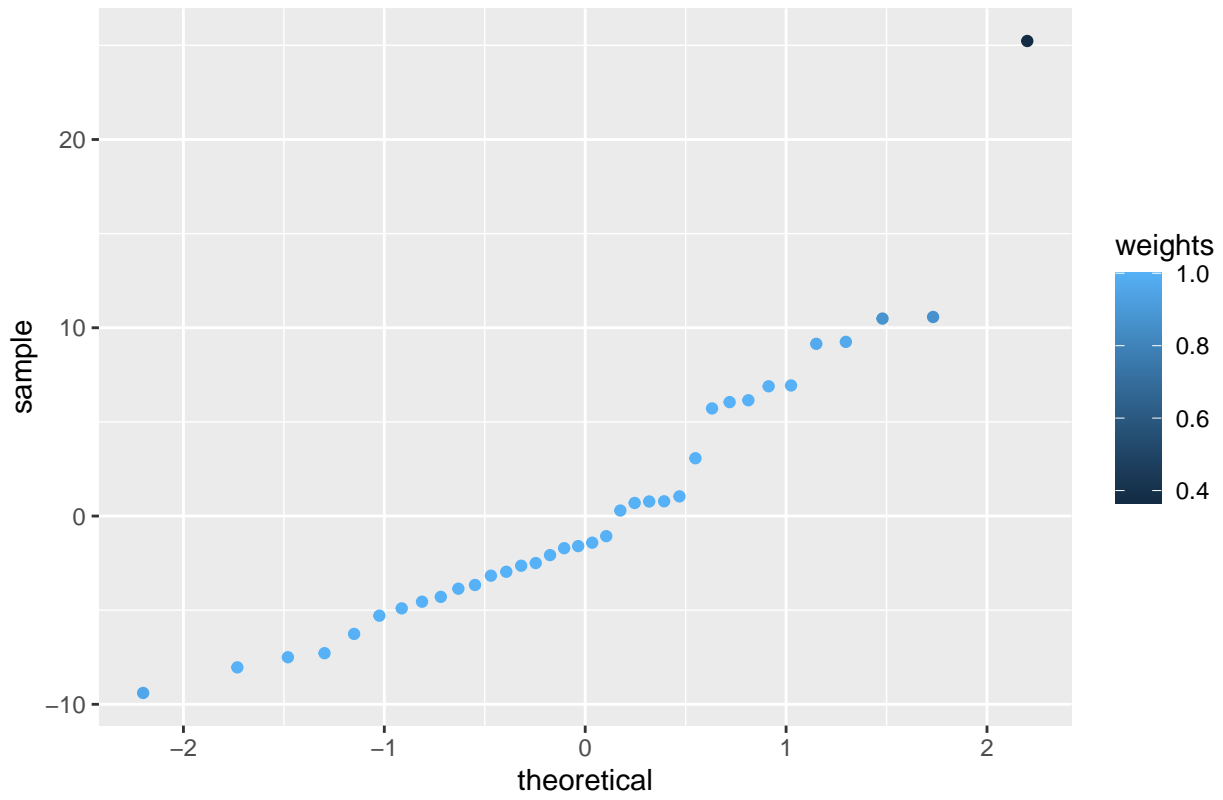

### 3 Results

#### 3.1 Fugl-Meyer Assessment Scale

| Group             | Time       | Baseline | Mean | SE  | 95% CI lower | 95% CI upper | df   | T-value | P-value |
|-------------------|------------|----------|------|-----|--------------|--------------|------|---------|---------|
| Chiropractic + PT | At 4-weeks | 40.9     | 64.1 | 2.0 | 60.1         | 68.2         | 75.7 | 11.4    | 0       |
| PT                | At 4-weeks | 40.9     | 58.0 | 2.1 | 53.9         | 62.1         | 75.7 | 8.2     | 0       |
| Chiropractic + PT | At 8-weeks | 40.9     | 64.3 | 2.4 | 59.6         | 69.1         | 86.4 | 9.8     | 0       |
| PT                | At 8-weeks | 40.9     | 59.8 | 2.4 | 55.1         | 64.6         | 85.9 | 7.9     | 0       |

| Contrast               | Time       | Mean | SE  | 95% CI lower | 95% CI upper | df   | T-value | P-value |
|------------------------|------------|------|-----|--------------|--------------|------|---------|---------|
| Chiropractic + PT - PT | At 4-weeks | 6.1  | 2.9 | 0.4          | 11.9         | 75.6 | 2.1     | 0.03767 |
| Chiropractic + PT - PT | At 8-weeks | 4.5  | 3.4 | -2.2         | 11.2         | 86.2 | 1.3     | 0.18664 |

#### 3.2 Fugl-Meyer Assessment Scale – Upper Extremity

| Group             | Time       | Baseline | Mean | SE  | 95% CI lower | 95% CI upper | df   | T-value | P-value |
|-------------------|------------|----------|------|-----|--------------|--------------|------|---------|---------|
| Chiropractic + PT | At 4-weeks | 24.1     | 38.9 | 1.7 | 35.5         | 42.4         | 79.7 | 8.6     | 0       |
| PT                | At 4-weeks | 24.1     | 36.0 | 1.8 | 32.5         | 39.5         | 79.6 | 6.7     | 0       |
| Chiropractic + PT | At 8-weeks | 24.1     | 40.3 | 2.1 | 36.2         | 44.4         | 87.2 | 7.8     | 0       |
| PT                | At 8-weeks | 24.1     | 37.3 | 2.1 | 33.2         | 41.4         | 86.9 | 6.4     | 0       |

| Contrast               | Time       | Mean | SE  | 95% CI lower | 95% CI upper | df   | T-value | P-value |
|------------------------|------------|------|-----|--------------|--------------|------|---------|---------|
| Chiropractic + PT - PT | At 4-weeks | 2.9  | 2.5 | -2.0         | 7.9          | 79.6 | 1.2     | 0.23550 |
| Chiropractic + PT - PT | At 8-weeks | 3.0  | 2.9 | -2.8         | 8.8          | 87.0 | 1.0     | 0.30678 |

#### 3.3 Fugl-Meyer Assessment Scale – Lower Extremity

| Group             | Time       | Baseline | Mean | SE  | 95% CI lower | 95% CI upper | df   | T-value | P-value |
|-------------------|------------|----------|------|-----|--------------|--------------|------|---------|---------|
| Chiropractic + PT | At 4-weeks | 16.8     | 25.0 | 0.8 | 23.3         | 26.7         | 71.7 | 9.7     | 0       |
| PT                | At 4-weeks | 16.8     | 22.1 | 0.9 | 20.4         | 23.8         | 71.7 | 6.2     | 0       |
| Chiropractic + PT | At 8-weeks | 16.8     | 24.2 | 1.0 | 22.3         | 26.2         | 85.2 | 7.6     | 0       |
| PT                | At 8-weeks | 16.8     | 22.4 | 1.0 | 20.4         | 24.3         | 84.4 | 5.7     | 0       |

| Contrast               | Time       | Mean | SE  | 95% CI lower | 95% CI upper | df   | T-value | P-value |
|------------------------|------------|------|-----|--------------|--------------|------|---------|---------|
| Chiropractic + PT - PT | At 4-weeks | 2.9  | 1.2 | 0.5          | 5.3          | 71.7 | 2.4     | 0.01743 |
| Chiropractic + PT - PT | At 8-weeks | 1.9  | 1.4 | -0.9         | 4.6          | 84.9 | 1.3     | 0.18484 |

### 3.4 QOL

| Group             | Time       | Baseline | Mean  | SE  | 95% CI lower | 95% CI upper | df   | T-value | P-value |
|-------------------|------------|----------|-------|-----|--------------|--------------|------|---------|---------|
| Chiropractic + PT | At 4-weeks | 122.1    | 162.5 | 7.2 | 148.1        | 176.9        | 62.4 | 5.6     | 0       |
| PT                | At 4-weeks | 122.1    | 171.7 | 7.4 | 157.0        | 186.5        | 62.3 | 6.7     | 0       |
| Chiropractic + PT | At 8-weeks | 122.1    | 190.6 | 8.1 | 174.5        | 206.8        | 79.7 | 8.4     | 0       |
| PT                | At 8-weeks | 122.1    | 174.0 | 8.1 | 157.9        | 190.0        | 76.0 | 6.4     | 0       |

| Contrast               | Time       | Mean | SE   | 95% CI lower | 95% CI upper | df   | T-value | P-value |
|------------------------|------------|------|------|--------------|--------------|------|---------|---------|
| Chiropractic + PT - PT | At 4-weeks | -9.2 | 10.4 | -30.0        | 11.5         | 62.2 | -0.9    | 0.37694 |
| Chiropractic + PT - PT | At 8-weeks | 16.7 | 11.5 | -6.2         | 39.6         | 77.8 | 1.4     | 0.15150 |

### 3.5 TUG

| Group             | Time       | Baseline | Mean | SE  | 95% CI lower | 95% CI upper | Z-value | P-value |
|-------------------|------------|----------|------|-----|--------------|--------------|---------|---------|
| Chiropractic + PT | At 4-weeks | 23.7     | 20.5 | 1.6 | 17.4         | 23.6         | -2.0    | 0.04745 |
| PT                | At 4-weeks | 23.7     | 21.7 | 1.5 | 18.6         | 24.7         | -1.3    | 0.19460 |
| Chiropractic + PT | At 8-weeks | 23.7     | 21.3 | 1.8 | 17.7         | 24.9         | -1.3    | 0.19559 |
| PT                | At 8-weeks | 23.7     | 20.4 | 2.0 | 16.5         | 24.3         | -1.7    | 0.09693 |

| Contrast               | Time       | Mean | SE  | 95% CI lower | 95% CI upper | Z-value | P-value |
|------------------------|------------|------|-----|--------------|--------------|---------|---------|
| Chiropractic + PT - PT | At 4-weeks | -1.2 | 2.2 | -5.5         | 3.2          | -0.5    | 0.60241 |
| Chiropractic + PT - PT | At 8-weeks | 0.9  | 2.7 | -4.4         | 6.2          | 0.3     | 0.73610 |

### 3.6 mRS

| Group             | Time       | Baseline | Mean | SE  | 95% CI lower | 95% CI upper | Z-value | P-value |
|-------------------|------------|----------|------|-----|--------------|--------------|---------|---------|
| Chiropractic + PT | At 4-weeks | 2.8      | 2.4  | 0.2 | 2.0          | 2.8          | -2.6    | 0.00942 |
| PT                | At 4-weeks | 2.8      | 2.4  | 0.2 | 2.0          | 2.8          | -2.4    | 0.01672 |
| Chiropractic + PT | At 8-weeks | 2.8      | 2.2  | 0.2 | 1.8          | 2.6          | -3.4    | 0.00080 |
| PT                | At 8-weeks | 2.8      | 2.1  | 0.2 | 1.7          | 2.5          | -3.6    | 0.00028 |

| Contrast               | Time       | Mean | SE  | 95% CI lower | 95% CI upper | Z-value | P-value |
|------------------------|------------|------|-----|--------------|--------------|---------|---------|
| Chiropractic + PT - PT | At 4-weeks | 0.0  | 0.3 | -0.5         | 0.5          | -0.1    | 0.94292 |
| Chiropractic + PT - PT | At 8-weeks | 0.1  | 0.3 | -0.4         | 0.6          | 0.3     | 0.74960 |

### 3.7 SST

Mean difference (MD) is defined as  $[\text{Chiropractic} + \text{PT} - (\text{Chiropractic} + \text{PT})\text{Baseline}] - [\text{PT} - (\text{PT})\text{Baseline}]$ .

| Group             | Time       | Mean | SE  | 95% CI lower | 95% CI upper | Z-value | P-value |
|-------------------|------------|------|-----|--------------|--------------|---------|---------|
| Chiropractic + PT | Baseline   | 21.3 | 2.1 | 17.2         | 25.4         | NA      | NA      |
| PT                | Baseline   | 22.7 | 2.0 | 18.7         | 26.7         | NA      | NA      |
| Chiropractic + PT | At 4-weeks | 17.9 | 2.1 | 13.8         | 22.0         | -1.1    | 0.25733 |
| PT                | At 4-weeks | 20.8 | 2.0 | 16.8         | 24.8         | -0.6    | 0.51574 |
| Chiropractic + PT | At 8-weeks | 17.4 | 2.3 | 12.8         | 21.9         | -1.2    | 0.21269 |
| PT                | At 8-weeks | 17.8 | 2.6 | 12.6         | 22.9         | -1.5    | 0.14150 |

| Contrast | Time       | Mean | SE  | 95% CI lower | 95% CI upper | Z-Value | P-value |
|----------|------------|------|-----|--------------|--------------|---------|---------|
| MD       | At 4-weeks | -1.5 | 4.2 | -9.6         | 6.6          | -0.4    | 0.71933 |
| MD       | At 8-weeks | 1.0  | 4.6 | -8.0         | 9.9          | 0.2     | 0.83004 |
